# Supplementary material for: Influence of estuarine tidal mixing on structure and spatial scales of large river plumes
Source: Copernicus journal article supplement (doi:10.5194/os-16-781-2020), 2020-07-03
Supplement: Supplementary file 1 [file Khatanga-2000.xlsx]

## Sheet: salinity
Station	Salinity	Depth, m		Station	Salinity	Depth, m		Station	Salinity	Depth, m		Station	Salinity	Depth, m		Station	Salinity	Depth, m		Station	Salinity	Depth, m		Station	Salinity	Depth, m		Station	Salinity	Depth, m		Station	Salinity	Depth, m
24	17.83	0		26	14.48	0		27	16.85	0		28	18.58	0		29	19.59	0		30	19.11	0		31	26.85	0		32	24.81	0		34	26.27	0
	17.9	1			14.57	1			16.83	1			18.59	1			19.55	1			19.05	1			28.23	1			24.85	1			26.44	1
	18.08	2			14.61	2			16.83	2			18.6	2			19.55	2			19.05	2			28.41	2			24.85	2			26.44	2
	18.19	3			14.62	3			16.83	3			18.62	3			19.6	3			19.05	3			29.86	3			24.85	3			26.64	3
	18.46	4			14.63	4			16.83	4			18.62	4			19.75	4			19.05	4			30.63	4			24.85	4			26.73	4
	26.5	5			14.82	5			16.85	5			18.61	5			20.47	5			19.05	5			30.79	5			24.85	5			26.8	5
	30.24	6			18.69	6			16.95	6			18.82	6			20.86	6			19.05	6			30.87	6			25.19	6			26.98	6
	30.53	7			19.04	7			21.17	7			23.45	7			28.2	7			19.05	7			30.94	7			26.55	7			27.08	7
	31	8			19.31	8			23.84	8			23.93	8			30.52	8			22.74	8			31.03	8			26.75	8			27.25	8
	31.21	9			22.15	9			27.62	9			23.96	9			30.62	9			30.01	9			31.18	9			26.75	9			27.48	9
	31.3	10			23.82	10			28.41	10			23.97	10			30.71	10			30.1	10			31.4	10			26.82	10			27.49	10
	31.5	11			28.14	11			28.95	11			23.99	11			30.77	11			30.11	11			31.51	11			27.82	11			27.87	11
	31.78	12			30.8	12			29.1	12			24.01	12			30.77	12			30.13	12			31.75	12			28.21	12			29.05	12
	31.91	13			30.87	13			29.14	13							30.83	13			30.12	13			32.11	13			29.2	13			29.4	13
	32.02	14			30.89	14			29.17	14							30.84	14			30.13	14			32.11	14			29.77	14			29.56	14
	32.1	15			30.9	15											30.89	15			30.11	15			32.11	15			30.23	15			30.19	15
	32.15	16			30.92	16											31.07	16			30.12	16			32.11	16			30.31	16			31.49	16
	32.22	17			30.95	17											31.49	17							32.11	17			31.22	17			31.65	17
	32.32	18			30.98	18											31.57	18											32.24	18			31.72	18
	32.34	19			30.98	19											31.71	19											32.3	19
	32.34	20			31	20											31.7	20
	32.33	21			31	21
	32.33	22			31	22
	32.32	23			31	23
	32.33	24			31	24
	32.36	25
	32.36	26
	32.35	27
	32.33	28
	32.35	29
	32.35	30
	32.35	31

## Sheet: coordinates
stations	date	time	latitude, N	longitude, E
24	2000-08-27	08:07:00	74.762	113.999
26	2000-08-27	17:47:00	73.995	113.945
27	2000-08-27	21:26:00	74.001	115.956
28	2000-08-28	01:24:00	73.987	117.962
29	2000-08-28	06:02:00	74.736	117.988
30	2000-08-28	09:30:00	74.737	116.115
31	2000-08-28	15:07:00	75.481	114.044
32	2000-08-28	19:04:00	75.461	116.048
34	2000-08-29	07:37:00	74.869	121.949
