# Supplementary material for: Influence of estuarine tidal mixing on structure and spatial scales of large river plumes
Source: Copernicus journal article supplement (doi:10.5194/os-16-781-2020), 2020-07-03
Supplement: Supplementary file 1 [file os-16-781-2020-supplement.zip]

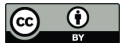

## *Supplement of*

# **Influence of estuarine tidal mixing on structure and spatial scales of large river plumes**

**Alexander Osadchiev et al.**

*Correspondence to:* Alexander Osadchiev (osadchiev@ocean.ru)

- os-16-781-2020-supplement-title-page.pdf
- Khatanga-2000.xlsx
- Khatanga-2017.xlsx
- Yenisei-2016.xlsx

The copyright of individual parts of the supplement might differ from the CC BY 4.0 License.
