# Supplementary material for: Influence of estuarine tidal mixing on structure and spatial scales of large river plumes
Source: Copernicus journal article supplement (doi:10.5194/os-16-781-2020), 2020-07-03
Supplement: Supplementary file 2 [file Khatanga-2017.xlsx]

## Sheet: salinity
Station	Depth, m	Salinity		Station	Depth, m	Salinity		Station	Depth, m	Salinity		Station	Depth, m	Salinity		Station	Depth, m	Salinity		Station	Depth, m	Salinity		Station	Depth, m	Salinity
5627	0.4	3.49		5628	0.4	3.44		5629	0.4	11.08		5630	0.4	17.08		5631	0.4	18.84		5632	0.4	21.91		5591	1.4	22.32
5627	0.6	3.49			0.6	3.45			0.6	11.12			0.6	17.1			0.6	18.85			0.6	21.91			1.6	22.33
5627	0.6	3.49			0.8	3.45			0.8	11.14			0.8	17.13			0.8	18.85			0.8	21.91			1.8	22.34
5627	0.8	3.49			1	3.46			1	11.17			1	17.13			1	18.85			1	21.91			2	22.34
5627	1	3.49			1.2	3.47			1.2	11.19			1.2	17.14			1.2	18.86			1.2	21.91			2.2	22.35
5627	1.2	3.5			1.4	3.48			1.4	11.21			1.4	17.14			1.4	18.86			1.4	21.91			2.4	22.36
5627	1.4	3.5			1.6	3.48			1.6	11.22			1.6	17.16			1.6	18.87			1.6	21.92			2.6	22.36
5627	1.6	3.51			1.8	3.49			1.8	11.24			1.8	17.16			1.8	18.87			1.8	21.92			2.8	22.38
5627	1.8	3.52			2	3.49			2	11.26			2	17.17			2	18.87			2	21.91			3	22.38
5627	2	3.54			2.2	3.5			2.2	11.3			2.2	17.17			2.2	18.87			2.2	21.92			3.2	22.37
5627	2.2	3.55			2.4	3.5			2.4	11.36			2.4	17.18			2.4	18.87			2.4	21.92			3.4	22.36
5627	2.4	3.56			2.6	3.51			2.6	11.42			2.6	17.18			2.6	18.88			2.6	21.92			3.6	22.32
5627	2.6	3.58			2.8	3.52			2.8	11.49			2.8	17.18			2.8	18.88			2.8	21.93			3.8	22.33
5627	2.8	3.67			3	3.54			3	11.51			3	17.19			3	18.89			3	21.93			4	22.32
5627	3	3.72			3.2	3.55			3.2	11.59			3.2	17.21			3.2	18.89			3.2	21.93			4.2	22.33
5627	3.2	3.85			3.4	3.58			3.4	11.62			3.4	17.22			3.4	18.89			3.3	21.93			4.4	22.33
5627	3.4	3.9			3.6	3.63			3.6	11.63			3.6	17.24			3.6	18.9			3.6	21.93			4.6	22.34
5627	3.6	3.97			3.8	3.67			3.8	11.65			3.8	17.25			3.8	18.9			3.8	21.93			4.8	22.35
5627	3.8	3.99			4	3.68			4	11.66			4	17.27			4	18.9			4	21.93			5	22.35
5627	4	4.02			4.2	3.69			4.2	11.78			4.2	17.26			4.2	18.91			4.2	21.93			5.2	22.36
5627	4.2	4.03			4.4	3.69			4.4	11.8			4.4	17.26			4.4	18.92			4.4	21.93			5.4	22.37
5627	4.4	4.07			4.6	3.69			4.6	11.89			4.6	17.31			4.6	18.92			4.6	21.94			5.6	22.38
5627	4.6	4.1			4.8	3.7			4.8	12.02			4.8	17.26			4.8	18.92			4.8	21.94			5.8	22.39
5627	4.8	4.12			5	3.71			5	12.2			5	17.27			5	18.92			5	21.94			6	22.4
5627	5	4.12			5.2	3.72			5.2	12.29			5.2	17.28			5.2	18.91			5.2	21.94			6.2	22.41
5627	5.2	4.12			5.4	3.76			5.4	12.31			5.4	17.31			5.4	18.91			5.4	21.94			6.4	22.41
5627	5.4	4.17			5.8	4.26			5.6	12.34			5.6	17.31			5.6	18.92			5.6	21.94			6.6	22.42
5627	5.6	4.35			6	4.39			5.8	12.39			5.8	17.34			5.8	18.92			5.8	21.94			6.8	22.42
5627	5.8	4.66			6.2	4.62			6	12.52			6	17.35			6	18.92			6	21.94			7	22.43
5627	6	4.84			6.4	4.89			6.2	12.93			6.2	17.4			6.2	18.94			6.2	21.94			7.2	22.43
5627	6.2	5.16			6.6	5.12			6.4	13.24			6.4	17.42			6.4	18.93			6.4	21.94			7.4	22.43
5627	6.4	5.3			6.8	5.21			6.6	13.33			6.6	17.44			6.6	18.93			6.6	21.95			7.6	22.44
5627	6.6	5.31			7.2	5.43			6.8	13.38			6.8	17.39			6.8	18.93			6.8	21.94			7.8	22.45
5627	6.8	5.33			7.4	5.52			7	13.42			7	17.38			7	18.93			7	21.95			8	22.68
5627	7	5.34			7.6	5.61			7.2	13.51			7.2	17.4			7.2	18.93			7.2	21.95			8.2	24.08
5627	7.2	5.39			7.8	5.75			7.4	13.56			7.4	17.41			7.4	18.95			7.4	21.95			8.4	26.88
5627	7.4	5.4			8	5.84			7.6	13.69			7.6	17.44			7.6	18.97			7.6	21.95			8.6	28.1
5627	7.6	5.41			8.2	5.88			7.8	13.83			7.8	17.44			7.8	18.98			7.8	21.95			8.8	28.82
5627	7.8	5.43			8.4	5.93			8	13.97			8	17.49			8	18.99			8	21.95			9	29.23
5627	8	5.57			8.8	6.11			8.2	14.15			8.2	17.52			8.2	18.99			8.2	21.95			9.2	29.86
5627	8.2	5.61			9	6.15			8.4	14.33			8.4	17.58			8.4	19.02			8.4	21.95			9.4	30.13
5627	8.4	5.84							8.6	14.37			8.6	17.6			8.6	19.04			8.6	21.95			9.6	30.21
5627	8.6	5.93							8.8	14.42			8.8	17.62			8.8	19.04			8.8	21.96			9.8	30.27
5627	8.8	6.02							9	14.42			9	17.65			9	19.06			9	21.96			10	30.4
5627	9	6.06							9.2	14.45			9.2	17.67			9.2	19.07			9.2	21.96			10.2	30.54
5627	9.2	6.11							9.4	14.46			9.4	17.62			9.4	19.02			9.4	21.96			10.4	30.63
5627	9.4	6.2							9.6	14.42			9.6	17.58			9.6	19.16			9.6	21.97			10.6	30.72
5627	9.6	6.29							9.8	14.44			9.8	17.62			9.8	19.2			9.8	21.97			10.8	30.76
5627	9.8	6.38							10	14.46			10	17.67			10	19.25			10	21.98			11	30.85
5627	10	6.47							10.2	14.51			10.2	17.71			10.2	19.38			10.2	21.98			11.2	30.9
5627	10.2	6.52							10.4	14.55			10.4	17.76			10.4	19.56			10.4	22			11.4	30.94
5627	10.4	6.61							10.6	14.64			10.6	17.85			10.6	19.75			10.6	22			11.6	30.99
5627	10.6	7.73							10.8	14.69			10.8	17.89			10.8	19.77			10.8	22.09			11.8	31.08
5627	10.8	9.13							11	14.7			11	17.94			11	19.79			11	22.32			12	31.14
5627	11	9.36							11.2	14.73			11.2	17.98			11.2	19.93			11.2	22.82			12.2	31.14
5627	11.2	9.41							11.4	14.78			11.4	18.01			11.4	19.97			11.4	23			12.4	31.21
5627	11.4	9.5							11.6	14.8			11.6	18.01			11.6	20.11			11.6	23.18			12.6	31.26
5627	11.6	9.54							11.8	14.82			11.8	18.02			11.8	20.38			11.8	23.45			12.8	31.3
5627	11.8	9.72							12	14.85			12	18.04			12	20.51			12	23.9			13	31.35
5627	12	9.77							12.2	14.87			12.2	18.07			12.2	20.78			12.2	24.58			13.2	31.44
5627	12.2	9.81							12.4	14.96			12.4	18.16			12.4	21.05			12.4	25.39			13.4	31.46
									12.6	15			12.6	18.21			12.6	21.42			12.6	26.02			13.6	31.53
									12.8	15.05			12.8	18.22			12.8	21.78			12.8	26.38			13.8	31.58
									13	15.07			13	18.3			13	22.05			13	26.56			14	31.67
									13.2	15.08			13.2	18.3			13.2	22.59			13.2	26.7			14.2	31.71
									13.4	15.09			13.4	18.53			13.4	22.82			13.4	26.83			14.4	31.8
									13.6	15.13			13.6	18.75			13.6	22.91			13.6	27.01			14.6	31.85
									13.8	15.14			13.8	19.02			13.8	22.93			13.8	27.29			14.8	31.94
									14	15.14			14	19.25			14	22.95			14	27.65			15	32.03
									14.2	15.15			14.2	19.34			14.2	23.04			14.2	27.92			15.2	32.12
									14.4	15.15			14.4	19.52			14.4	23.13			14.4	28.32			15.4	32.16
									14.6	15.15			14.6	19.61			14.6	23.18			14.6	28.73			15.6	32.16
									14.8	15.16			14.8	19.65			14.8	23.4			14.8	29.18			15.8	32.21
									15	15.16			15	19.67			15	23.63			15	29.59			16	32.3
									15.2	15.16			15.2	19.7			15.2	23.85			15.2	29.99			16.2	32.34
									15.4	15.16			15.4	19.75			15.4	23.94			15.4	30.22			16.4	32.39
									15.6	15.17			15.6	19.84			15.6	24.03			15.6	30.49			16.6	32.43
									15.8	15.17			15.8	19.93			15.8	24.08			15.8	30.63			16.8	32.44
									16	15.17			16	20.06			16	24.26			16	30.76			17	32.48
									16.2	15.17			16.2	20.09			16.2	24.44			16.2	30.81			17.2	32.52
									16.4	15.17			16.4	20.09			16.4	24.67			16.4	30.85			17.4	32.57
									16.6	15.17			16.6	20.11			16.6	24.85			16.6	30.87			17.6	32.61
									16.8	15.18			16.8	20.12			16.8	25.03			16.8	30.89			17.8	32.66
									17	15.18			17	20.14			17	25.25			17	30.9			18	32.7
									17.2	15.18			17.2	20.14			17.2	25.43			17.2	30.96			18.2	32.7
									17.4	15.18			17.4	20.15			17.4	25.57			17.4	30.99			18.4	32.7
									17.6	15.19			17.6	20.16			17.6	25.66			17.6	31.12			18.6	32.79
									17.8	15.2			17.8	20.18			17.8	25.71			17.8	31.26			18.8	32.81
									18	15.2			18	20.18			18	25.72			18	31.35			19	32.84
									18.2	15.21			18.2	20.2			18.2	25.75			18.2	31.39			19.2	32.85
									18.4	15.21			18.4	20.22			18.4	25.8			18.4	31.44			19.4	32.88
									18.6	15.23			18.6	20.24			18.6	25.93			18.6	31.53			19.6	32.93
													18.8	20.29			18.8	25.98			18.8	31.67			19.8	32.97
													19	20.3			19	26.07			19	31.71			20	33.02
													19.2	20.32			19.2	26.47			19.2	31.76			20.2	33.02
													19.4	20.33			19.4	27.69			19.4	31.8			20.4	33.03
													19.6	20.34			19.6	29.5			19.6	31.85			20.6	33.06
													19.8	20.35			19.8	30.54			19.8	31.94			20.8	33.07
													20	20.38			20	30.9			20	31.98			21	33.11
													20.2	20.38			20.2	30.99			20.2	32.03			21.2	33.16
													20.4	20.4			20.4	31.03			20.4	32.07			21.4	33.17
													20.6	20.41			20.6	31.08			20.6	32.12			21.6	33.17
													20.8	20.42			20.8	31.12			20.8	32.16			21.8	33.18
													21	20.51			21	31.19			21	32.21			22	33.2
													21.2	20.53			21.2	31.21			21.2	32.3			22.2	33.2
													21.4	20.56			21.4	31.22			21.4	32.34			22.4	33.2
													21.6	20.6			21.6	31.24			21.6	32.39			22.6	33.2
													21.8	20.92			21.8	31.24			21.8	32.43			22.8	33.22
													22	21.33			22	31.26			22	32.43			23	33.22
													22.2	23.22			22.2	31.3			22.2	32.48			23.2	33.25
													22.4	24.67			22.4	31.31			22.4	32.49			23.4	33.23
													22.6	25.3			22.6	31.33			22.6	32.5			23.6	33.2
													22.8	25.36			22.8	31.33			22.8	32.51			23.8	33.24
													23	25.39			23	31.35			23	32.52			24	33.25
													23.2	25.43			23.2	31.35			23.2	32.54			24.2	33.27
													23.4	25.48			23.4	31.35			23.4	32.55			24.4	33.28
													23.6	25.61			23.6	31.35			23.6	32.56			24.6	33.29
													23.8	25.75			23.8	31.35			23.8	32.57			24.8	33.29
													24	25.89			24	31.35			24	32.57			25	33.29
													24.2	25.93			24.2	31.36			24.2	32.59			25.2	33.3
																	24.4	31.36			24.4	32.59			25.4	33.31
																	24.6	31.36			24.6	32.6			25.6	33.31
																	24.8	31.36			24.8	32.61			25.8	33.32
																	25	31.37			25	32.63			26	33.32
																	25.2	31.37			25.2	32.63			26.2	33.32
																	25.4	31.38			25.4	32.64			26.4	33.33
																	25.6	31.39			25.6	32.65			26.6	33.34
																	25.8	31.39			25.8	32.66			26.8	33.35
																	26	31.39			26	32.66			27	33.38
																	26.2	31.39			26.2	32.68			27.2	33.38
																	26.4	31.4			26.4	32.7			27.4	33.39
																					26.6	32.7			27.6	33.4
																					26.8	32.72			27.8	33.4
																					27	32.75			28	33.42
																					27.2	32.79			28.2	33.42
																					27.4	32.82			28.4	33.43
																					27.6	32.84			28.6	33.45
																					27.8	32.88			28.8	33.46
																					28	32.93			29	33.47
																					28.2	32.96			29.2	33.48
																					28.4	32.97			29.4	33.49
																					28.6	32.98			29.6	33.5
																					28.8	32.98			29.8	33.5
																					29	32.98			30	33.5
																					29.2	32.99			30.2	33.52
																					29.4	32.99			30.4	33.52
																					29.6	32.99			30.6	33.53
																					29.8	32.99			30.8	33.55
																					30	32.99			31	33.56
																					30.2	32.99			31.2	33.57
																					30.4	33			31.4	33.58
																					30.6	33			31.6	33.58
																									31.8	33.59
																									32	33.6
																									32.2	33.61
																									32.4	33.61
																									32.6	33.61
																									32.8	33.62
																									33	33.62
																									33.2	33.63
																									33.4	33.63
																									33.6	33.64
																									33.8	33.64
																									34	33.64
																									34.2	33.65
																									34.4	33.65
																									34.6	33.65
																									34.8	33.65
																									35	33.65
																									35.2	33.65
																									35.4	33.65
																									35.6	33.66
																									35.8	33.66
																									36	33.65
																									36.2	33.65
																									36.4	33.65
																									36.6	33.65
																									36.8	33.65
																									37	33.65
																									37.2	33.65
																									37.4	33.66
																									37.6	33.66
																									37.8	33.66
																									38	33.66
																									38.2	33.66
																									38.4	33.66
																									38.6	33.66
																									38.8	33.66
																									39	33.66
																									39.2	33.66
																									39.4	33.66
																									39.6	33.66
																									39.8	33.66
																									40	33.66
																									40.2	33.66
																									40.4	33.66
																									40.6	33.66
																									40.8	33.66
																									41	33.66
																									41.2	33.66
																									41.4	33.66
																									41.6	33.66
																									41.8	33.66

## Sheet: coordinates
stations	date	time	latitude, N	longitude, E
5627	2017-09-17	11:13:00	73.4937	108.18
5628	2017-09-17	13:18:00	73.4737	107.944
5629	2017-09-17	17:59:00	73.8658	109.203
5630	2017-09-17	22:13:00	74.2668	110.352
5631	2017-09-18	02:33:00	74.5682	111.669
5632	2017-09-18	13:01:00	74.8468	113.809
5591	2017-09-18	18:06:00	75.4117	115.431
