# Supplementary material for: Influence of estuarine tidal mixing on structure and spatial scales of large river plumes
Source: Copernicus journal article supplement (doi:10.5194/os-16-781-2020), 2020-07-03
Supplement: Supplementary file 2 [file os-16-781-2020-supplement.zip]

Archive with 4 entries (4 files):
- Khatanga-2000.xlsx
- Yenisei-2016.xlsx
- os-16-781-2020-supplement-title-page.pdf
- Khatanga-2017.xlsx
