# Supplementary material for: Influence of estuarine tidal mixing on structure and spatial scales of large river plumes
Source: Copernicus journal article supplement (doi:10.5194/os-16-781-2020), 2020-07-03
Supplement: Supplementary file 2 [file os-16-781-2020-supplement.zip › Yenisei-2016.xlsx]

## Sheet: salinity
Station	Salinity	Depth, m		Station	Salinity	Depth, m		Station	Salinity	Depth, m		Station	Salinity	Depth, m		Station	Salinity	Depth, m		Station	Salinity	Depth, m		Station	Salinity	Depth, m		Station	Salinity	Depth, m		Station	Salinity	Depth, m		Station	Salinity	Depth, m		Station	Salinity	Depth, m		Station	Salinity	Depth, m		Station	Salinity
5333	7.36	0.6		5334	6.41	0.4		5335	7.05	0.4		5336	7.43	0.6		5337	7.54	1		5338	6.82	0.4		5339	5.62	0.4		5340	5.98	0.6		5341	3.27	0.6		5342	0.87	0.4		5343	1.63	0.6		5344	0.66	0.6		5345	0.44
	7.36	0.8			6.41	0.6			7.05	0.6			7.43	0.8			7.54	1.2			6.82	0.6			5.63	0.6			5.98	0.8			3.27	0.8			0.87	0.6			1.63	0.8			0.66	0.8			0.44
	7.36	1			6.41	0.8			7.09	0.8			7.43	1			7.54	1.4			6.82	0.8			5.63	0.8			5.98	1			3.27	1			0.87	1			1.63	1			0.66	1			0.44
	7.36	1.2			6.41	1			7.1	1			7.43	1.2			7.54	1.6			6.82	1			5.63	1			5.98	1.2			3.28	1.2			0.88	1.2			1.63	1.2			0.67	1.2			0.44
	7.37	1.4			6.41	1.2			7.1	1.2			7.47	1.4			7.54	1.8			6.82	1.2			5.62	1.2			5.98	1.4			3.28	1.4			0.89	1.4			1.63	1.4			0.67	1.4			0.44
	7.37	1.6			6.41	1.4			7.11	1.6			7.5	1.6			7.54	2			6.82	1.4			5.63	1.4			5.99	1.6			3.28	1.6			0.89	1.6			1.63	1.6			0.67	1.6			0.44
	7.38	1.8			6.41	1.6			7.7	1.8			7.54	2.2			7.54	2.2			6.82	1.6			5.62	1.6			5.99	1.8			3.28	1.8			0.9	1.8			1.63	1.8			0.67	1.8			0.44
	7.38	2			6.41	1.8			8.61	2			7.69	2.4			7.54	2.4			6.82	1.8			5.62	1.8			5.99	2			3.28	2			1.09	2			1.63	2			0.66	2			0.44
	7.39	2.2			6.41	2			8.88	2.8			7.72	2.6			7.57	2.6			6.82	2			5.63	2			5.99	2.2			3.28	2.2			1.38	2.2			1.63	2.2			0.66	2.2			0.44
	7.41	2.4			6.41	2.2			8.85	3			7.74	2.8			7.58	2.8			6.82	2.2			5.63	2.2			5.99	2.4			3.28	2.4			1.49	2.4			1.64	2.4			0.66	2.4			0.44
	7.45	2.6			6.41	2.4			9.08	3.2			8.26	3			7.67	3.2			6.85	2.4			5.64	2.4			5.99	2.6			3.28	2.6			1.51	3			1.64	2.6			0.66	2.6			0.44
	7.49	2.8			6.49	2.6			9.22	3.4			9.42	3.2			7.67	4			6.85	2.6			5.64	3			5.99	2.8			3.28	2.8			1.66	4			1.66	2.8			0.65	2.8			0.44
	7.58	3			6.85	2.8			9.38	3.6			9.69	3.4			7.88	4.2			6.87	2.8			5.64	3.2			5.98	3			3.28	3			1.91	4.2			1.7	3			0.64	3			0.44
	7.63	3.2			6.97	3.2			9.45	4			10.61	4			7.88	4.6			6.94	3			5.64	3.4			5.98	3.2			3.29	3.2			1.94	4.8			1.75	3.2			0.64	3.2			0.44
	7.66	3.4			7.22	3.4			9.46	4.4			10.85	4.2			7.88	4.8			7.05	3.2			5.64	3.6			5.98	3.4			3.29	3.4			2.33	5			1.82	3.4			0.64	3.4			0.44
	7.68	3.6			7.29	3.6			9.51	4.6			11.45	4.4			7.95	5			7.13	3.4			5.7	3.8			5.98	3.6			3.29	3.6			2.48	5.2			1.91	3.6			0.65	3.6			0.44
	7.74	3.8			7.34	3.8			9.64	5.4			12.09	4.6			8	5.2			7.17	3.6			5.72	4.4			5.98	3.8			3.29	3.8			3.34	5.4			2.17	3.8			0.65	3.8			0.44
	8.24	4			7.36	4			10.44	5.8			12.47	4.8			8.14	5.4			7.35	3.8			5.8	4.6			5.98	4			3.29	4			3.87	5.6			2.63	4			0.66	4			0.44
	9.21	4.2			7.48	4.2			11.04	6			13.09	5			8.18	5.6			7.42	4			6.09	4.8			5.98	4.2			3.29	4.2			3.95	5.8			2.99	4.2			0.69	4.2			0.44
	9.67	4.4			7.5	4.4			11.76	6.6			13.7	5.2			8.21	6.2			7.64	4.2			6.57	5			5.98	4.4			3.3	4.4			4.15	6.2			3.15	4.4			0.69	4.4			0.44
	9.76	5			7.5	4.6			12.6	6.8			14.13	5.4			8.24	6.4			7.68	4.4			7.99	5.2			5.98	4.6			3.32	4.6			4.87	6.4			3.23	4.6			0.69	4.6			0.44
	9.77	5.2			7.38	5.6			14.09	7			14.43	5.6			8.38	6.6			7.72	4.6			8.31	5.4			5.98	4.8			3.33	4.8			6.85	6.8			3.49	4.8			0.69	4.8			0.44
	9.89	5.4			8.13	5.8			17.48	7.2			14.51	5.8			8.54	6.8			7.79	5.4			8.94	5.6			5.98	5			3.34	5			11.37	7			3.69	5.4			0.7	5			0.44
	10.51	5.6			8.81	6			19.5	7.4			14.85	6			8.99	7			7.93	5.6			12.34	5.8			5.99	5.2			3.35	5.2			14.97	7.2			3.78	5.6			0.7	5.2			0.44
	11.22	5.8			12.15	6.2			20.64	7.6			16.52	6.2			9.44	7.2			7.93	5.8			12.77	6			6.21	5.4			3.36	5.4			15.92	7.4			3.94	5.8			0.71	5.4			0.44
	11.86	6			14.61	6.4			21.12	7.8			18.13	6.4			9.69	7.4			8.06	6.4			13.11	6.2			7.49	5.6			3.37	5.6			16.68	7.6			4.09	6			0.7	5.6			0.44
	12.79	6.2			16	6.6			21.73	8			19.08	6.6			9.7	7.6			8.27	6.6			13.18	6.4			8.32	5.8			3.39	5.8			17.2	7.8			4.35	6.2			0.71	5.8			0.44
	14.54	6.4			16.79	6.8			22.07	8.2			19.57	6.8			10.02	7.8			8.56	6.8			13.21	6.6			8.54	6			3.42	6			17.94	8			4.66	6.4			0.75	6			0.44
	15.11	6.6			16.74	7.4			22.74	8.4			20.17	7			11.83	8			8.8	7			13.45	6.8			8.67	6.2			3.45	6.2			18.8	8.2			5	6.6			0.77	6.2			0.44
	15.51	6.8			17.46	7.6			23.06	8.6			20.65	7.2			12.65	8.2			8.95	7.2			15.8	7			9.18	6.4			3.46	6.4			19.51	8.4			5.3	6.8			0.81	6.4			0.44
	16.04	7			18.7	7.8			23.5	8.8			21.16	7.4			13.03	8.4			9.3	7.4			17.94	7.2			9.22	6.6			3.48	6.6			19.84	8.6			5.55	7			0.88	6.6			0.45
	16.74	7.2			20.36	8			23.51	9			22.11	7.6			13.74	8.6			10.06	7.6			21.66	7.4			9.56	6.8			3.51	6.8			20.39	8.8			6.25	7.2			0.95	6.8			0.48
	16.91	7.4			21.62	8.2			24.25	9.2			23.39	7.8			15.17	8.8			10.83	7.8			24.31	7.6			10.58	7			3.53	7			20.74	9			8.03	7.4			1.13	7			0.52
	17.19	7.6			22.28	8.4			24.79	9.4			24.59	8			17.57	9			12.16	8			25.07	7.8			11.75	7.2			3.56	7.2			21.93	9.2			14.74	7.6			1.13	7.2			0.54
	18.11	7.8			22.61	8.6			25.11	9.6			26.01	8.2			19.01	9.2			13.85	8.2			25.98	8			11.91	7.4			3.59	7.4			24.6	9.4			19.3	7.8			1.17	7.4			0.55
	18.35	8			22.86	8.8			25.39	9.8			26.8	8.4			20.08	9.4			15.01	8.4			26.88	8.2			11.99	7.8			3.62	7.6			26.81	9.6			19.73	8			1.38	7.6			0.58
	19.25	8.2			23.11	9			25.67	10			27.23	8.6			20.27	9.6			15.98	8.6			27.34	8.4			12.52	8			3.67	7.8			27.36	9.8			19.84	8.2			1.4	7.8			0.59
	20.09	8.4			23.3	9.2			25.94	10.2			27.56	8.8			20.41	9.8			16.23	8.8			27.75	8.6			13.12	8.2			3.74	8			27.58	10			19.89	8.4			1.42	8			0.63
	20.9	8.6			23.44	9.4			26.15	10.4			27.91	9			21.13	10			16.37	9			28.25	8.8			14.2	8.4			3.81	8.2			27.66	10.2			20.1	8.6			1.43	8.2			0.67
	21.52	8.8			23.57	9.6			26.35	10.6			28.19	9.2			21.79	10.2			16.49	9.2			28.53	9			15.43	8.6			3.88	8.4			27.73	10.4			20.46	8.8			1.43	8.4			0.77
	21.94	9			23.72	9.8			26.5	10.8			28.5	9.4			22.33	10.4			16.68	9.4			28.66	9.2			16.7	8.8			4.02	8.6			27.82	10.6			20.99	9							0.84
	22.4	9.2			23.9	10			26.66	11			28.9	9.6			22.87	10.6			17.02	9.6			28.71	9.4			18.79	9			4.21	8.8			27.84	10.8											0.88
	22.89	9.4			24.14	10.2			26.8	11.2			29.16	9.8			23.17	10.8			17.23	9.8			28.74	9.6			20.68	9.2			4.35	9			27.84	11											0.93
	23.38	9.6			24.37	10.4			26.92	11.4			29.19	10			23.36	11			17.53	10			28.78	9.8			21.36	9.4			4.46	9.2															1.03
	23.81	9.8			24.53	10.6			27.02	11.6			29.3	10.6			23.57	11.2			17.96	10.2			28.81	10			22.15	9.6																			1.18
	24.24	10			24.7	10.8			27.14	11.8			29.33	10.8			23.75	11.4			18.69	10.4			28.83	10.2			24.68	9.8																			1.38
	24.67	10.2			24.87	11			27.27	12			29.37	11			23.89	11.6			19.54	10.6			28.85	10.4			25.89	10																			1.56
	25.09	10.4			25.08	11.2			27.43	12.2			29.49	11.2			24.03	11.8			21.16	10.8			28.87	10.6			26.3	10.2																			1.79
	25.46	10.6			25.34	11.4			27.56	12.4			29.63	11.4			24.23	12			22.93	11			28.89	10.8			26.55	10.4																			1.99
	25.71	10.8			25.59	11.6			27.69	12.6			29.79	11.6			24.51	12.2			24.15	11.2			28.91	11			26.67	10.6																			2.19
	25.91	11			25.8	11.8			27.81	12.8			29.93	11.8			24.84	12.4			25.37	11.4			28.92	11.2			26.86	10.8																			2.25
	26.09	11.2			25.94	12			27.94	13			30.04	12			25.16	12.6			26.15	11.6			28.94	11.4			27.06	11																			2.36
	26.25	11.4			26.04	12.2			28.08	13.2			30.13	12.2			25.5	12.8			26.85	11.8			28.95	11.6			27.29	11.2																			2.6
	26.43	11.6			26.13	12.4			28.22	13.4			30.19	12.4			25.84	13			27.49	12			28.96	11.8			27.48	11.4																			2.7
	26.58	11.8			26.2	12.6			28.33	13.6			30.27	12.6			26.13	13.2			28.07	12.2			28.98	12			27.61	11.6																			2.73
	26.7	12			26.28	12.8			28.4	13.8			30.38	12.8			26.39	13.4			28.49	12.4			29	12.2			27.77	11.8																			2.82
	26.81	12.2			26.36	13			28.49	14			30.54	13			26.55	13.6			28.77	12.6			29.04	12.4			27.92	12																			3.05
	26.92	12.4			26.45	13.2			28.63	14.2			30.65	13.2			26.67	13.8			29.07	12.8			29.09	12.6			28.01	12.2																			3.62
	27.01	12.6			26.54	13.4			28.8	14.4			30.72	13.4			26.73	14			29.28	13			29.14	12.8			28.03	12.4																			5.94
	27.1	12.8			26.64	13.6			28.91	14.6			30.77	13.6			26.94	14.2			29.51	13.2			29.22	13			28.16	12.6																			6.58
	27.18	13			26.75	13.8			29.02	14.8			30.83	13.8			27.06	14.4			29.65	13.4			29.29	13.2																							7.1
	27.26	13.2			26.85	14			29.12	15			30.91	14			27.15	14.6			29.72	13.6			29.39	13.4																							7.87
	27.34	13.4			26.95	14.2			29.24	15.2			30.99	14.2			27.21	14.8			29.89	13.8			29.47	13.6																							8.54
	27.42	13.6			27.06	14.4			29.36	15.4			31.04	14.4			27.25	15			30.02	14			29.51	13.8																							9.1
	27.52	13.8			27.18	14.6			29.45	15.6			31.06	14.6			27.32	15.2			30.08	14.2			29.6	14																							9.49
	27.62	14			27.3	14.8			29.52	15.8			31.08	14.8			27.49	15.4			30.09	14.4			29.62	14.2																							9.8
	27.7	14.2			27.42	15			29.59	16			31.1	15			27.72	15.6			30.1	14.6			29.65	14.4																							9.87
	27.78	14.4			27.53	15.2			29.66	16.2			31.12	15.2			28.01	15.8			30.11	14.8			29.69	14.6																							9.9
	27.86	14.6			27.62	15.4			29.72	16.4			31.14	15.4			28.43	16			30.13	15			29.74	14.8																							9.96
	27.96	14.8			27.7	15.6			29.79	16.6			31.16	15.6			28.74	16.2			30.15	15.2			29.81	15																							10.04
	28.05	15			27.78	15.8			29.88	16.8			31.2	15.8			29.03	16.4			30.18	15.4			29.99	15.2																							10.21
	28.13	15.2			27.85	16			29.99	17			31.26	16			29.24	16.6			30.19	15.6			30.3	15.4																							10.54
	28.21	15.4			27.92	16.2			30.09	17.2			31.32	16.2			29.47	16.8			30.2	15.8			30.86	15.6																							10.69
	28.28	15.6			27.99	16.4			30.19	17.4			31.36	16.4			29.58	17			30.21	16			30.97	15.8																							11.14
	28.36	15.8			28.07	16.6			30.3	17.6			31.37	16.6			29.64	17.2			30.22	16.2			30.98	16																							12.02
	28.43	16			28.14	16.8			30.42	17.8			31.38	16.8			29.67	17.4			30.22	16.4			30.99	16.2																							12.21
	28.49	16.2			28.22	17			30.56	18			31.38	17			29.85	17.6			30.22	16.6			31	16.4																							12.28
	28.53	16.4			28.31	17.2			30.68	18.2			31.45	17.2			29.96	17.8			30.23	16.8			31.02	16.6																							12.34
	28.57	16.6			28.39	17.4			30.82	18.4			31.53	17.4			30.03	18			30.23	17			31.03	16.8																							12.52
	28.63	16.8			28.48	17.6			30.92	18.6			31.63	17.6			30.14	18.2			30.23	17.2			31.06	17																							12.79
	28.69	17			28.56	17.8			31.02	18.8			31.69	17.8			30.26	18.4			30.23	17.4			31.08	17.2																							13.25
	28.73	17.2			28.63	18			31.11	19			31.72	18			30.32	18.6			30.23	17.6			31.09	17.4																							13.37
	28.81	17.4			28.69	18.2			31.18	19.2			31.74	18.2			30.34	18.8			30.24	17.8			31.09	17.6																							13.47
	28.83	17.6			28.75	18.4			31.26	19.4			31.74	18.4			30.35	19			30.24	18			31.09	17.8																							13.55
	28.86	17.8			28.8	18.6			31.3	19.6			31.74	18.6			30.37	19.2			30.25	18.2			31.09	18																							13.77
	28.91	18			28.85	18.8			31.33	19.8			31.75	18.8			30.38	19.4			30.28	18.4			31.09	18.2																							14.68
	28.94	18.2			28.89	19			31.36	20			31.75	19			30.4	19.6			30.32	18.6			31.09	18.4																							14.99
	28.95	18.4			28.93	19.2			31.39	20.2			31.75	19.2			30.41	19.8			30.35	18.8			31.09	18.6																							15.24
	28.96	18.6			28.98	19.4			31.43	20.4			31.75	19.4			30.41	20			30.37	19			31.1	18.8																							16.43
	29.03	18.8			29.02	19.6			31.51	20.6			31.75	19.6			30.42	20.2			30.4	19.2			31.13	19																							17.52
	29.13	19			29.07	19.8			31.58	20.8			31.76	19.8			30.43	20.4			30.44	19.4																											18.83
	29.21	19.2			29.11	20			31.6	21			31.76	20			30.44	20.6			30.45	19.6																											19.5
	29.26	19.4			29.15	20.2			31.61	21.2			31.76	20.2			30.46	20.8			30.5	19.8																											20.46
	29.31	19.6			29.2	20.4			31.62	21.4			31.76	20.4			30.51	21			30.57	20
	29.35	19.8			29.23	20.6			31.64	21.6			31.76	20.6			30.53	21.2			30.63	20.2
	29.4	20			29.27	20.8			31.65	21.8			31.76	20.8			30.54	21.4			30.68	20.4
	29.44	20.2			29.3	21			31.66	22			31.76	21			30.57	21.6			30.7	20.6
	29.48	20.4			29.32	21.2			31.66	22.2			31.76	21.2			30.65	21.8			30.75	20.8
	29.51	20.6			29.35	21.4			31.67	22.4			31.76	21.4			30.69	22			30.76	21
	29.54	20.8			29.38	21.6			31.67	22.6			31.76	21.6			30.72	22.2			30.76	21.2
	29.57	21			29.41	21.8			31.68	22.8			31.77	21.8			30.75	22.4			30.77	21.4
	29.6	21.2			29.43	22			31.69	23			31.77	22			30.77	22.6			30.77	21.6
	29.63	21.4			29.45	22.2			31.69	23.2			31.77	22.2			30.79	22.8			30.79	21.8
	29.66	21.6			29.47	22.4			31.7	23.4			31.77	22.4			30.81	23			30.82	22
	29.69	21.8			29.49	22.6			31.7	23.6			31.77	22.6			30.89	23.2			30.87	22.2
	29.72	22			29.51	22.8			31.71	23.8			31.77	22.8			31.1	23.4			30.91	22.4
	29.75	22.2			29.52	23			31.71	24			31.77	23			31.3	23.6			30.96	22.6
	29.78	22.4			29.54	23.2			31.71	24.2			31.77	23.2			31.43	23.8			30.99	22.8
	29.82	22.6			29.56	23.4			31.72	24.4			31.77	23.4			31.48	24			31.01	23
	29.83	22.8			29.59	23.6			31.72	24.6			31.78	23.6			31.49	24.2
	29.88	23			29.64	23.8			31.72	24.8			31.78	23.8			31.5	24.4
	29.93	23.2			29.72	24			31.73	25			31.78	24			31.5	24.6
	29.97	23.4			29.79	24.2			31.73	25.2			31.78	24.2			31.51	24.8
	30.03	23.6			29.85	24.4			31.73	25.4			31.78	24.4			31.51	25
	30.07	23.8			29.93	24.6			31.73	25.6			31.78	24.6			31.51	25.2
	30.11	24			30.01	24.8			31.73	25.8			31.78	24.8			31.51	25.4
	30.16	24.2			30.09	25			31.73	26			31.78	25			31.51	25.6
	30.19	24.4			30.17	25.2			31.73	26.2			31.78	25.2			31.51	25.8
	30.24	24.6			30.22	25.4			31.73	26.4			31.78	25.4			31.51	26
	30.28	24.8			30.26	25.6			31.74	26.6			31.78	25.6			31.51	26.2
	30.32	25			30.35	25.8			31.74	26.8			31.78	25.8			31.52	26.4
	30.36	25.2			30.47	26			31.74	27			31.78	26			31.56	26.6
	30.42	25.4			30.67	26.2			31.74	27.2			31.79	26.2			31.58	26.8
	30.47	25.6			30.78	26.4			31.74	27.4			31.79	26.4			31.6	27
	30.52	25.8			30.93	26.6			31.74	27.6			31.79	26.6			31.62	27.2
	30.6	26			31.07	26.8			31.74	27.8			31.79	26.8			31.74	27.4
	30.73	26.2			31.14	27			31.74	28			31.79	27			31.92	27.6
	30.82	26.4			31.18	27.2			31.74	28.2			31.79	27.2			31.96	27.8
	30.95	26.6							31.74	28.4			31.79	27.4			31.99	28
	30.96	26.8							31.74	28.6			31.79	27.6			31.99	28.2
	30.99	27							31.74	28.8			31.79	27.8			32	28.4
	31	27.2							31.74	29			31.79	28			32.01	29.2
	31	27.4							31.74	29.2			31.79	28.2			32	29.4
									31.74	29.4			31.79	28.4
									31.74	29.6			31.79	28.6
									31.74	29.8			31.79	28.8
									31.74	30			31.79	29
													31.79	29.2
													31.79	29.4
													31.79	29.6
													31.79	29.8
													31.81	30
													31.82	30.2
													31.82	30.4
													31.83	30.6
													31.83	30.8
													31.83	31.2
													31.83	31.4
													31.83	31.6
													31.84	31.8
													31.84	32
													31.84	32.2
													31.84	32.4
													31.84	32.6
													31.84	32.8
													31.84	33
													31.84	33.2
													31.84	33.4
													31.84	33.6
													31.84	33.8
													31.84	34
													31.83	34.2
[truncated: 19 more columns]

## Sheet: coordinates
stations	date	time	latitude, N	longitude, E
5333	2016-07-24	15:25:00	74.2503	79.1632
5334	2016-07-24	17:49:00	74.0073	79.384
5335	2016-07-24	20:01:00	73.764	79.6137
5336	2016-07-24	21:51:00	73.5587	79.7895
5337	2016-07-24	23:53:00	73.3073	79.8502
5338	2016-07-25	01:49:00	73.0565	79.925
5339	2016-07-25	03:39:00	72.8162	79.9987
5340	2016-07-25	05:40:00	72.5997	80.4172
5341	2016-07-25	07:51:00	72.3665	80.214
5342	2016-07-25	10:04:00	72.2068	80.8388
5343	2016-07-25	11:59:00	72.0935	81.4813
5344	2016-07-25	17:17:00	71.8665	82.1993
5345	2016-07-25	19:19:00	71.8403	82.9003
5348	2016-07-27	05:11:00	73.1702	79.8682
5349	2016-07-27	21:06:00	74.3002	78.6382
5350	2016-07-28	01:57:00	74.8658	78.4362
5351	2016-07-28	07:03:04.320000	75.2037	78.353
5352	2016-07-28	09:24:02.880000	75.281	78.309
5353	2016-07-28	15:37:00.480000	75.9163	78.5623
